# Supplementary material for: Sex differences in the change in cardiorespiratory fitness and additional physical and mental health outcomes after exercise training in adults with atrial fibrillation: a systematic review protocol
Source: bioRxiv or medRxiv preprint supplement (doi:10.1101/2022.05.19.22275338), 2022-05-20
Supplement: Supplementary file [file media-1.pdf]

Sex differences in the change in cardiorespiratory fitness and additional physical and mental health outcomes after exercise training in adults with atrial fibrillation: a systematic review protocol

## PRISMA-P 2015 Checklist

This checklist has been adapted for use with systematic review protocol submissions to BioMed Central journals from Table 3 in Moher D et al: Preferred reporting items for systematic review and meta-analysis protocols (PRISMA-P) 2015 statement. *Systematic Reviews* 2015 4:1

An Editorial from the Editors-in-Chief of *Systematic Reviews* details why this checklist was adapted - Moher D, Stewart L & Shekelle P: Implementing PRISMA-P: recommendations for prospective authors. *Systematic Reviews* 2016 5:15

| Section/topic                     | #  | Checklist item                                                                                                                                                                                         | Information reported                |                                     | Line number(s)                 |
|-----------------------------------|----|--------------------------------------------------------------------------------------------------------------------------------------------------------------------------------------------------------|-------------------------------------|-------------------------------------|--------------------------------|
|                                   |    |                                                                                                                                                                                                        | Yes                                 | No                                  |                                |
| <b>ADMINISTRATIVE INFORMATION</b> |    |                                                                                                                                                                                                        |                                     |                                     |                                |
| <b>Title</b>                      |    |                                                                                                                                                                                                        |                                     |                                     |                                |
| Identification                    | 1a | Identify the report as a protocol of a systematic review                                                                                                                                               | <input checked="" type="checkbox"/> | <input type="checkbox"/>            | Title                          |
| Update                            | 1b | If the protocol is for an update of a previous systematic review, identify as such                                                                                                                     | <input type="checkbox"/>            | <input checked="" type="checkbox"/> | N/A                            |
| <b>Registration</b>               | 2  | If registered, provide the name of the registry (e.g., PROSPERO) and registration number in the Abstract                                                                                               | <input checked="" type="checkbox"/> | <input type="checkbox"/>            | End of abstract                |
| <b>Authors</b>                    |    |                                                                                                                                                                                                        |                                     |                                     |                                |
| Contact                           | 3a | Provide name, institutional affiliation, and e-mail address of all protocol authors; provide physical mailing address of corresponding author                                                          | <input checked="" type="checkbox"/> | <input type="checkbox"/>            | Title page                     |
| Contributions                     | 3b | Describe contributions of protocol authors and identify the guarantor of the review                                                                                                                    | <input checked="" type="checkbox"/> | <input type="checkbox"/>            | Authors' contributions section |
| <b>Amendments</b>                 | 4  | If the protocol represents an amendment of a previously completed or published protocol, identify as such and list changes; otherwise, <u>state plan for documenting important protocol amendments</u> | <input checked="" type="checkbox"/> | <input type="checkbox"/>            | Page 8, L 6-8                  |
| <b>Support</b>                    |    |                                                                                                                                                                                                        |                                     |                                     |                                |
| Sources                           | 5a | Indicate sources of financial or other support for the review                                                                                                                                          | <input checked="" type="checkbox"/> | <input type="checkbox"/>            | Funding section                |
| Sponsor                           | 5b | Provide name for the review funder and/or sponsor                                                                                                                                                      | <input type="checkbox"/>            | <input checked="" type="checkbox"/> | N/A                            |
| Role of sponsor/funder            | 5c | Describe roles of funder(s), sponsor(s), and/or institution(s), if any, in developing the protocol                                                                                                     | <input type="checkbox"/>            | <input checked="" type="checkbox"/> | N/A                            |

## Sex differences in the change in cardiorespiratory fitness and additional physical and mental health outcomes after exercise training in adults with atrial fibrillation: a systematic review protocol

| Section/topic                             | #   | Checklist item                                                                                                                                                                                                            | Information reported                |                          | Line number(s)                                |
|-------------------------------------------|-----|---------------------------------------------------------------------------------------------------------------------------------------------------------------------------------------------------------------------------|-------------------------------------|--------------------------|-----------------------------------------------|
|                                           |     |                                                                                                                                                                                                                           | Yes                                 | No                       |                                               |
| <b>INTRODUCTION</b>                       |     |                                                                                                                                                                                                                           |                                     |                          |                                               |
| <b>Rationale</b>                          | 6   | Describe the rationale for the review in the context of what is already known                                                                                                                                             | <input checked="" type="checkbox"/> | <input type="checkbox"/> | Pages 6 to 7                                  |
| <b>Objectives</b>                         | 7   | Provide an explicit statement of the question(s) the review will address with reference to participants, interventions, comparators, and outcomes (PICO)                                                                  | <input checked="" type="checkbox"/> | <input type="checkbox"/> | Page 7, L 13-20                               |
| <b>METHODS</b>                            |     |                                                                                                                                                                                                                           |                                     |                          |                                               |
| <b>Eligibility criteria</b>               | 8   | Specify the study characteristics (e.g., PICO, study design, setting, time frame) and report characteristics (e.g., years considered, language, publication status) to be used as criteria for eligibility for the review | <input checked="" type="checkbox"/> | <input type="checkbox"/> | Page 8, L10 to Page 10, L 21                  |
| <b>Information sources</b>                | 9   | Describe all intended information sources (e.g., electronic databases, contact with study authors, trial registers, or other grey literature sources) with planned dates of coverage                                      | <input checked="" type="checkbox"/> | <input type="checkbox"/> | Page 10, L23 to page 11 L 11<br>Page 13, L1-8 |
| <b>Search strategy</b>                    | 10  | Present draft of search strategy to be used for at least one electronic database, including planned limits, such that it could be repeated                                                                                | <input checked="" type="checkbox"/> | <input type="checkbox"/> | Table 1.                                      |
| <b>STUDY RECORDS</b>                      |     |                                                                                                                                                                                                                           |                                     |                          |                                               |
| <b>Data management</b>                    | 11a | Describe the mechanism(s) that will be used to manage records and data throughout the review                                                                                                                              | <input checked="" type="checkbox"/> | <input type="checkbox"/> | Page 11, L13-15<br>Page 12, L4-6              |
| <b>Selection process</b>                  | 11b | State the process that will be used for selecting studies (e.g., two independent reviewers) through each phase of the review (i.e., screening, eligibility, and inclusion in meta-analysis)                               | <input checked="" type="checkbox"/> | <input type="checkbox"/> | Page 11, L12 to Page 12, L2                   |
| <b>Data collection process</b>            | 11c | Describe planned method of extracting data from reports (e.g., piloting forms, done independently, in duplicate), any processes for obtaining and confirming data from investigators                                      | <input checked="" type="checkbox"/> | <input type="checkbox"/> | Page 12, L3 to Page 13 L8                     |
| <b>Data items</b>                         | 12  | List and define all variables for which data will be sought (e.g., PICO items, funding sources), any pre-planned data assumptions and simplifications                                                                     | <input checked="" type="checkbox"/> | <input type="checkbox"/> | Page 12 L6 to 21                              |
| <b>Outcomes and prioritization</b>        | 13  | List and define all outcomes for which data will be sought, including prioritization of main and additional outcomes, with rationale                                                                                      | <input checked="" type="checkbox"/> | <input type="checkbox"/> | Page 12 L6 to 21                              |
| <b>Risk of bias in individual studies</b> | 14  | Describe anticipated methods for assessing risk of bias of individual studies, including whether this will be done at the outcome or study level, or both; state how this information will be used in data                | <input checked="" type="checkbox"/> | <input type="checkbox"/> | Page 13, L9 to page 14 L6                     |

Sex differences in the change in cardiorespiratory fitness and additional physical and mental health outcomes after exercise training in adults with atrial fibrillation: a systematic review protocol

| Section/topic                            | #   | Checklist item                                                                                                                                                                                                                              | Information reported                |                          | Line number(s)                                    |
|------------------------------------------|-----|---------------------------------------------------------------------------------------------------------------------------------------------------------------------------------------------------------------------------------------------|-------------------------------------|--------------------------|---------------------------------------------------|
|                                          |     |                                                                                                                                                                                                                                             | Yes                                 | No                       |                                                   |
|                                          |     | synthesis                                                                                                                                                                                                                                   |                                     |                          |                                                   |
| <b>DATA</b>                              |     |                                                                                                                                                                                                                                             |                                     |                          |                                                   |
| <b>Synthesis</b>                         | 15a | Describe criteria under which study data will be quantitatively synthesized                                                                                                                                                                 | <input checked="" type="checkbox"/> | <input type="checkbox"/> | Page 13, L8 to 15                                 |
|                                          | 15b | If data are appropriate for quantitative synthesis, describe planned summary measures, methods of handling data, and methods of combining data from studies, including any planned exploration of consistency (e.g., $I^2$ , Kendall's tau) | <input checked="" type="checkbox"/> | <input type="checkbox"/> | Page 13, L11 to 25<br>Page 15, L15 to Page 16, L2 |
|                                          | 15c | Describe any proposed additional analyses (e.g., sensitivity or subgroup analyses, meta-regression)                                                                                                                                         | <input checked="" type="checkbox"/> | <input type="checkbox"/> | Page 15, L1 to 14                                 |
|                                          | 15d | If quantitative synthesis is not appropriate, describe the type of summary planned                                                                                                                                                          | <input checked="" type="checkbox"/> | <input type="checkbox"/> | Page 14, L 23 to 25                               |
| <b>Meta-bias(es)</b>                     | 16  | Specify any planned assessment of meta-bias(es) (e.g., publication bias across studies, selective reporting within studies)                                                                                                                 | <input checked="" type="checkbox"/> | <input type="checkbox"/> | Page 15, L15 to Page 16, L2                       |
| <b>Confidence in cumulative evidence</b> | 17  | Describe how the strength of the body of evidence will be assessed (e.g., GRADE)                                                                                                                                                            | <input checked="" type="checkbox"/> | <input type="checkbox"/> | Page 14, L1-6                                     |
